# Supplementary material for: The interaction of Hg2+and trivalent ions with two new fluorescein bio-inspired dual colorimetric/fluorimetric probes
Source: Royal Society of Chemistry journal article supplement (doi:10.1039/c6dt01180b), 2016-01-01
Supplement: c6dt01180b1.pdf [file c6dt01180b1.pdf]

## Electronic Supporting Information

# About the Interaction of $\text{Hg}^{2+}$ and Trivalent Ions with Two New Fluorescein Bio-inspired Dual Colorimetric/Fluorimetric Probes

*Augusto C. Gonçalves<sup>† ‡</sup>, Viviane Pilla<sup>ψ ‡</sup>, Elisabete Oliveira<sup>‡ δ</sup>, Sérgio M. Santos<sup>χ</sup>, José*

*Luis Capelo<sup>‡ δ</sup>, Carlos Lodeiro<sup>‡ δ \*</sup>, Alcindo A. Dos Santos<sup>† \*</sup>*

<sup>‡</sup> BIOSCOPE Group, UCIBIO-REQUIMTE, Departamento de Química, Faculdade de Ciências e Tecnologia, Universidade Nova de Lisboa, 2829-516 Portugal.

<sup>†</sup> Instituto de Química, Universidade de São Paulo, Av. Prof. Lineu Prestes, 748, CxP. 26077, São Paulo, 05508-00, Brazil.

<sup>ψ</sup> Instituto de Física, Universidade Federal de Uberlândia-UFU, Av. João Naves de Ávila 2121, Uberlândia, MG, 38400-902, Brazil,

<sup>χ</sup> CICECO - Aveiro Institute of Materials, Department of Chemistry, University of Aveiro, 3810-193 Aveiro, Portugal.

<sup>δ</sup> Proteomass Scientific Society, Rua dos Inventores, Madan Park, 2829-516 Caparica, Portugal.

\*Correspondent author: Carlos Lodeiro (cle@fct.unl.pt) / Alcindo Aparecido dos Santos (alcindo@iq.usp.br).

## INDEX

|                                                                                                                                         |     |
|-----------------------------------------------------------------------------------------------------------------------------------------|-----|
| <sup>1</sup> H NMR spectrum of <b>1</b>                                                                                                 | S1  |
| <sup>13</sup> C NMR spectrum of <b>1</b>                                                                                                | S2  |
| <sup>1</sup> H NMR spectrum of <b>2</b>                                                                                                 | S3  |
| <sup>13</sup> C NMR spectrum of <b>2</b>                                                                                                | S4  |
| <sup>1</sup> H NMR spectrum of <b>3</b>                                                                                                 | S5  |
| <sup>13</sup> C NMR spectrum of <b>3</b>                                                                                                | S6  |
| Spectrofotometric/spectrofluorimetric titration of <b>2</b> and <b>3</b> with Al <sup>3+</sup>                                          | S7  |
| Spectrofotometric/spectrofluorimetric titration of <b>2</b> and <b>3</b> with Fe <sup>3+</sup>                                          | S8  |
| Spectrofotometric/spectrofluorimetric titration of <b>2</b> and <b>3</b> with Cr <sup>3+</sup>                                          | S9  |
| Spectrofotometric/spectrofluorimetric titration of <b>2</b> and <b>3</b> with Ga <sup>3+</sup>                                          | S10 |
| MALDI-TOF-MS spectrum of <b>1</b>                                                                                                       | S11 |
| MALDI-TOF-MS spectrum of <b>2</b>                                                                                                       | S12 |
| HRMS spectrum of <b>3</b>                                                                                                               | S13 |
| Job's plot of <b>2</b> and <b>3</b> with Al <sup>3+</sup> , Cr <sup>3+</sup> , Fe <sup>3+</sup> , Ga <sup>3+</sup> and Hg <sup>2+</sup> | S14 |
| Absorption and emission spectra of <b>1</b> , <b>2</b> and <b>3</b> in 1:1 acetonitrile/water                                           | S15 |

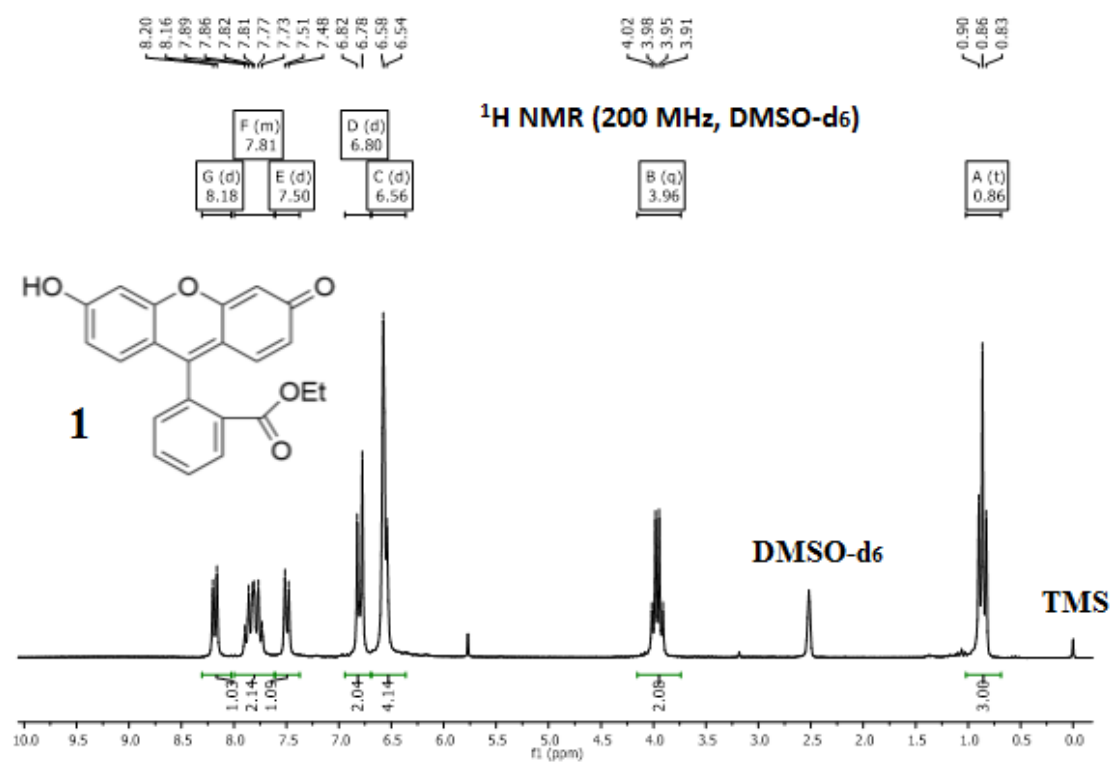

**Figure S1.** <sup>1</sup>H NMR spectrum of **1**.

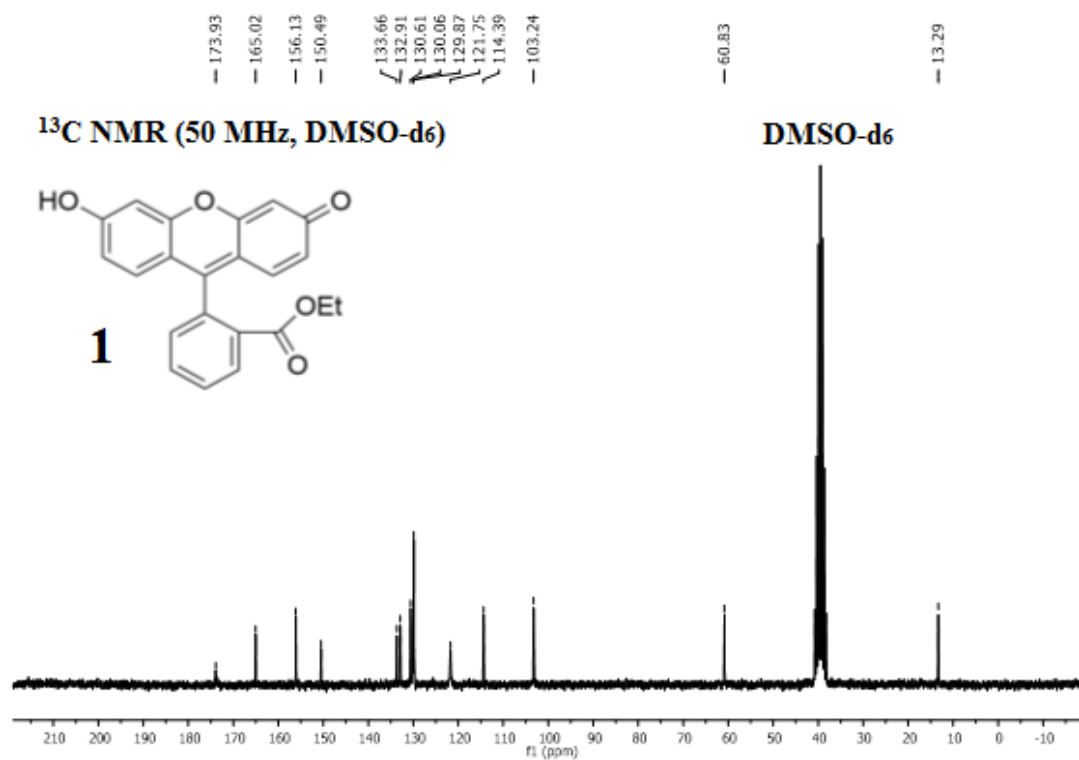

**Figure S2.** <sup>13</sup>C NMR spectrum of **1**.

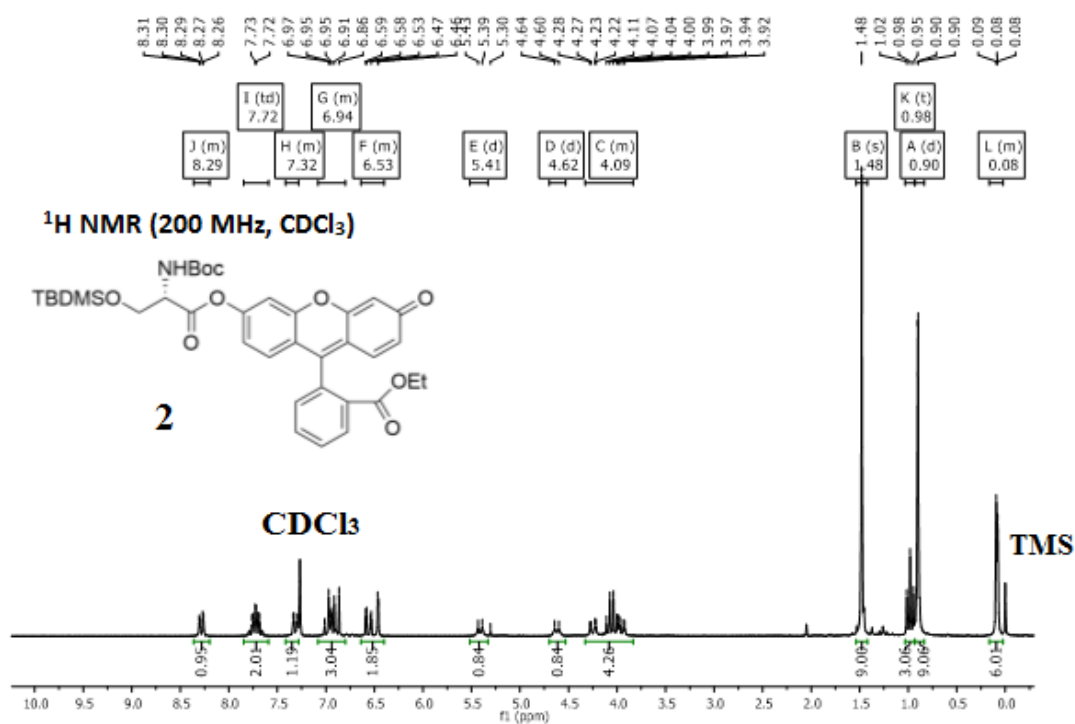

**Figure S3.** <sup>1</sup>H NMR spectrum of **2**.

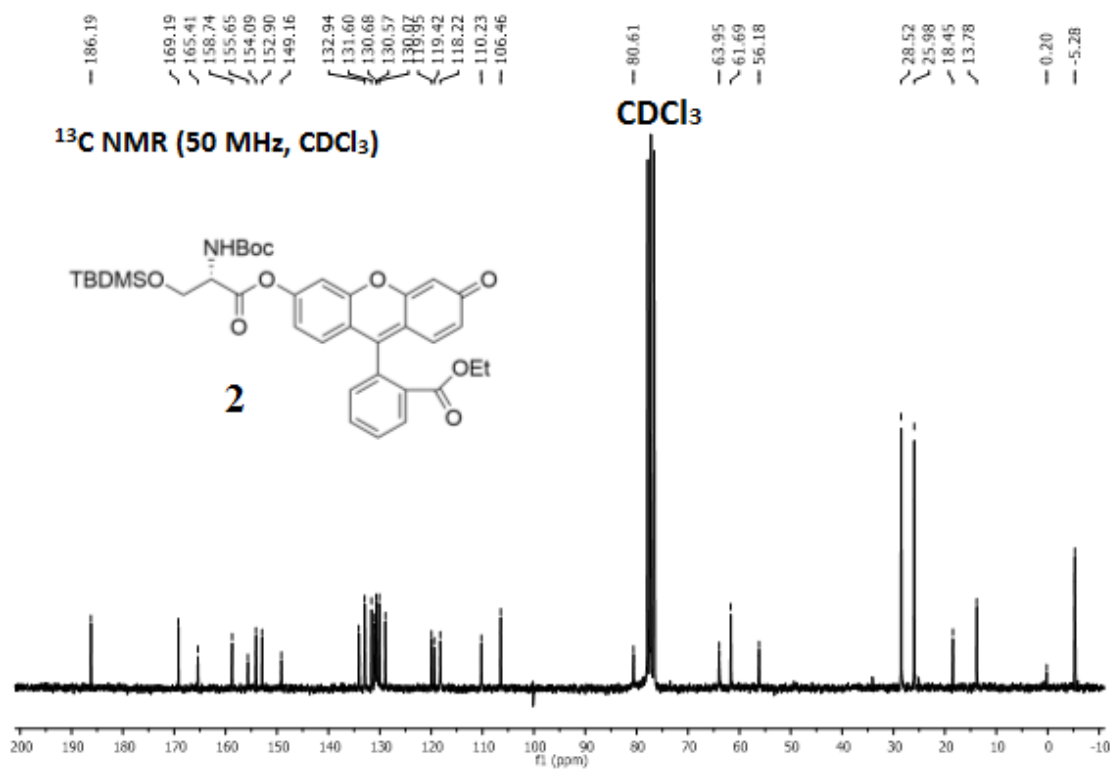

**Figure S4.** <sup>13</sup>C NMR spectrum of **2**.

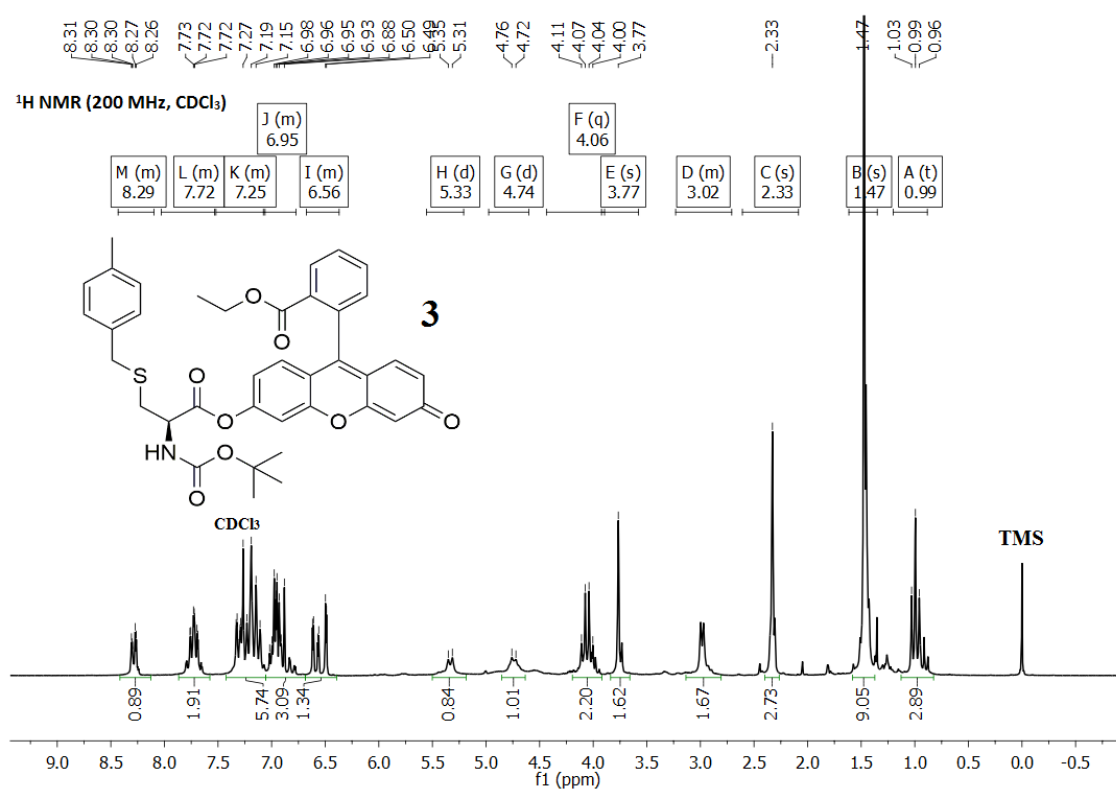

**Figure S5.** <sup>1</sup>H NMR spectrum of **3**.

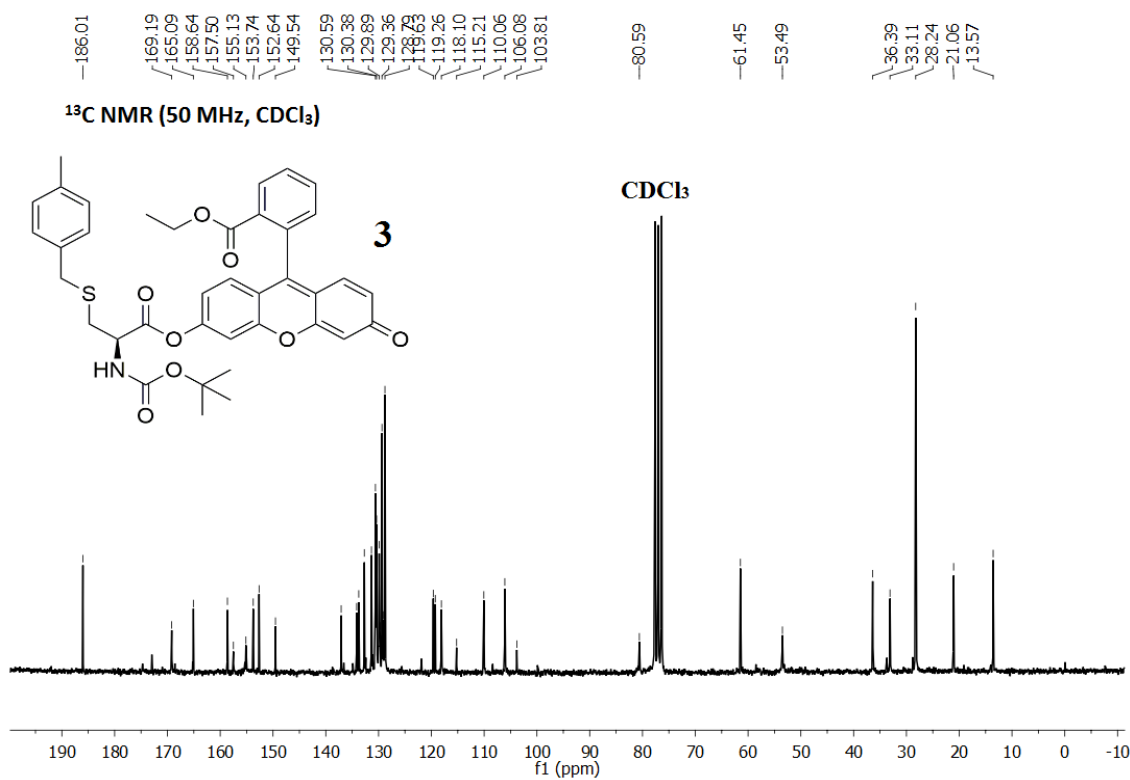

**Figure S6.** <sup>13</sup>C NMR spectrum of **3**.

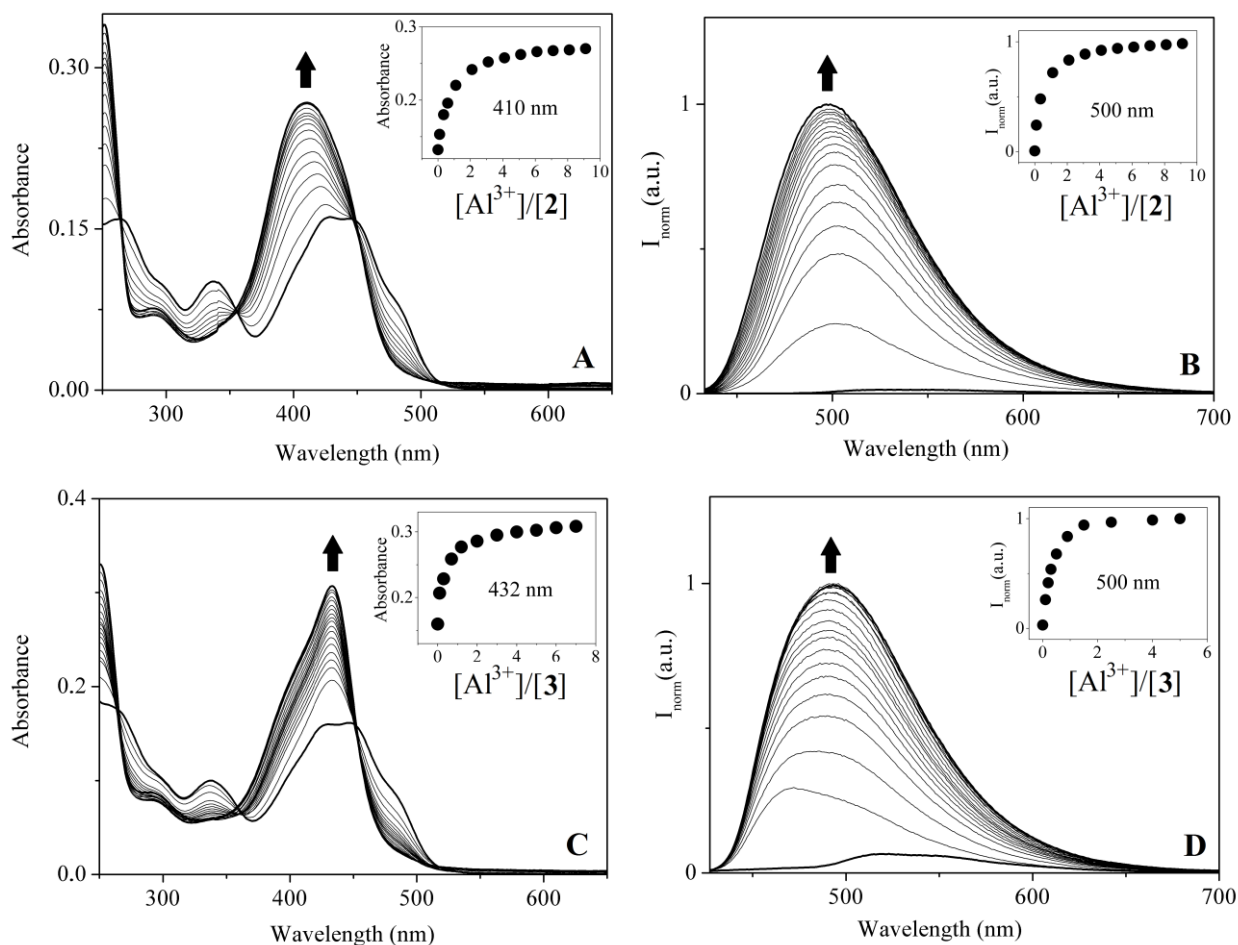

**Figure S7.** Spectrophotometric titrations of **2** (A) and **3** (C), with increasing amounts of  $\text{Al}^{3+}$  in acetonitrile solution. Inset: Absorption at 410 nm (A) and 432 nm (C) as a function of  $[\text{Al}^{3+}]/[\textbf{2}]$  and  $[\text{Al}^{3+}]/[\textbf{3}]$ , respectively ( $T = 298 \text{ K}$ ;  $[\textbf{2}] = [\textbf{3}] = 1.10^{-5} \text{ M}$ ). Spectrofluorimetric titrations of **2** (B) and **3** (D), with increasing amounts of  $\text{Al}^{3+}$  in acetonitrile solution. Inset: Emission at 500 nm as a function of  $[\text{Al}^{3+}]/[\textbf{2}]$  and  $[\text{Al}^{3+}]/[\textbf{3}]$  ( $T = 298 \text{ K}$ ;  $[\textbf{2}] = [\textbf{3}] = 1.10^{-5} \text{ M}$ ,  $\lambda_{\text{exc}} = 362 \text{ nm}$ ).

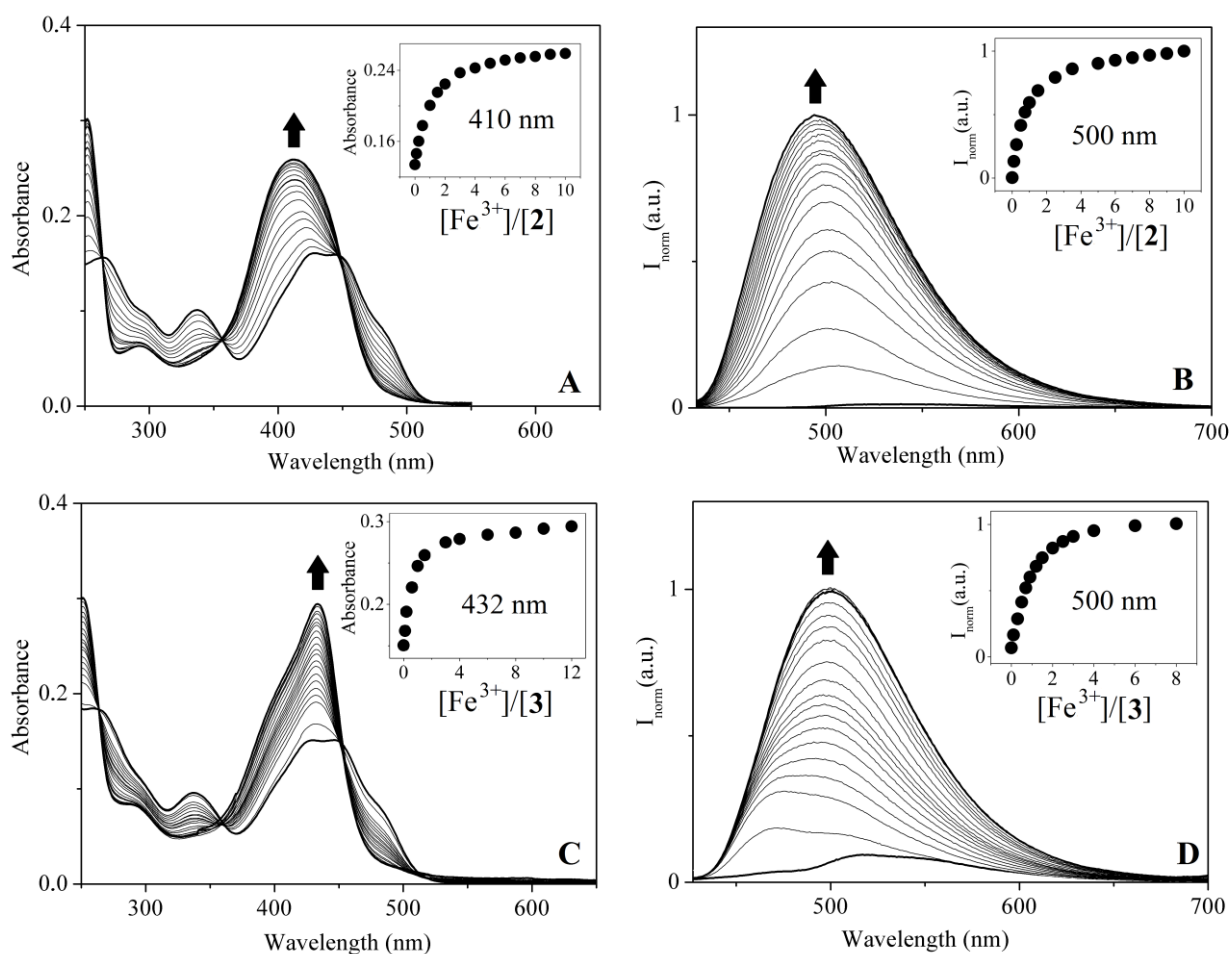

**Figure S8.** Spectrophotometric titrations of **2** (A) and **3** (C), with increasing amounts of  $\text{Fe}^{3+}$  in acetonitrile solution. Inset: Absorption at 410 nm (A) and 432 nm (C) as a function of  $[\text{Fe}^{3+}]/[\mathbf{2}]$  and  $[\text{Fe}^{3+}]/[\mathbf{3}]$ , respectively ( $T = 298 \text{ K}$ ;  $[\mathbf{2}] = [\mathbf{3}] = 1.10^{-5} \text{ M}$ ). Spectrofluorimetric titrations of **2** (B) and **3** (D), with increasing amounts of  $\text{Fe}^{3+}$  in acetonitrile solution. Inset: Emission at 500 nm as a function of  $[\text{Fe}^{3+}]/[\mathbf{2}]$  and  $[\text{Fe}^{3+}]/[\mathbf{3}]$  ( $T = 298 \text{ K}$ ;  $[\mathbf{2}] = [\mathbf{3}] = 1.10^{-5} \text{ M}$ ,  $\lambda_{\text{exc}} = 362 \text{ nm}$ ).

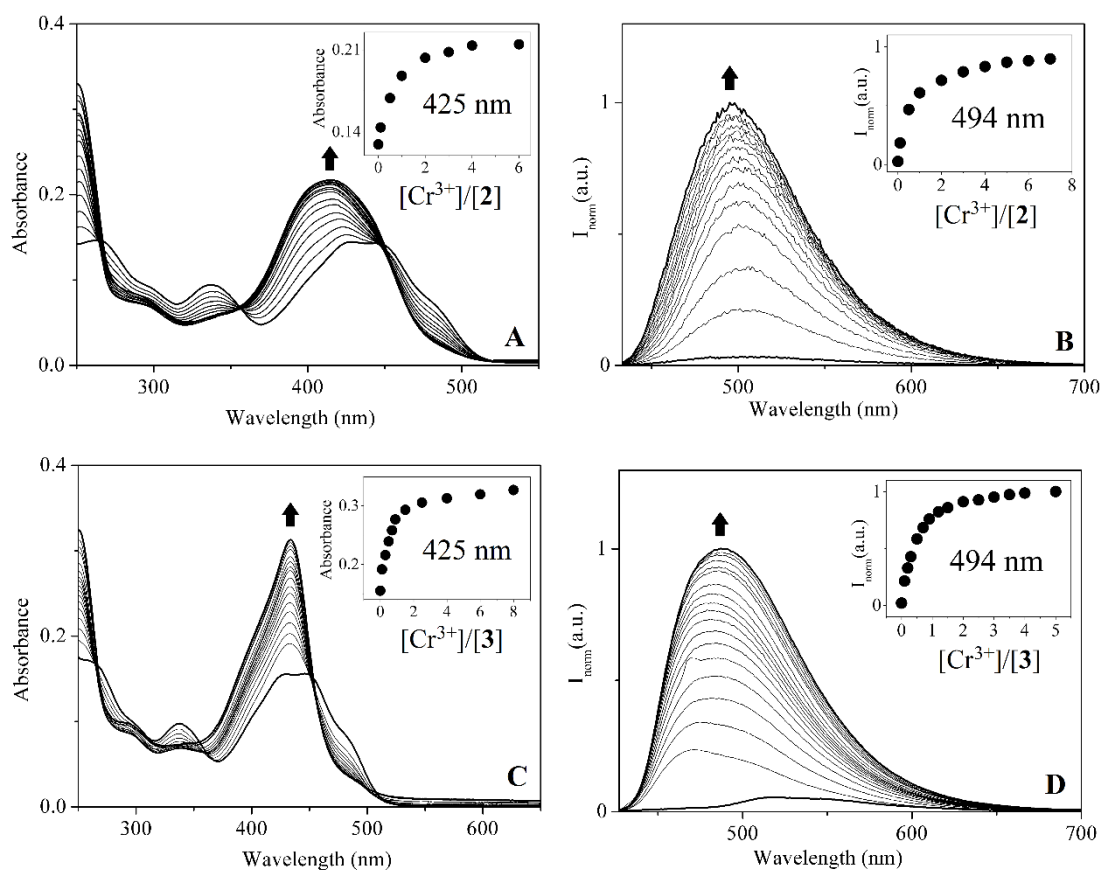

**Figure S9.** Spectrophotometric titrations of **2** (A) and **3** (C), with increasing amounts of  $\text{Cr}^{3+}$  in acetonitrile solution. Inset: Absorption at 425 nm as a function of  $[\text{Cr}^{3+}]/[\mathbf{2}]$  and  $[\text{Cr}^{3+}]/[\mathbf{3}]$  ( $T = 298 \text{ K}$ ;  $[\mathbf{2}] = [\mathbf{3}] = 1.10^{-5} \text{ M}$ ). Spectrofluorimetric titrations of **2** (B) and **3** (D), with increasing amounts of  $\text{Cr}^{3+}$  in acetonitrile solution. Inset: Emission at 494 nm as a function of  $[\text{Cr}^{3+}]/[\mathbf{2}]$  and  $[\text{Cr}^{3+}]/[\mathbf{3}]$  ( $T = 298 \text{ K}$ ;  $[\mathbf{2}] = [\mathbf{3}] = 1.10^{-5} \text{ M}$ ,  $\lambda_{\text{exc}} = 362 \text{ nm}$ ).



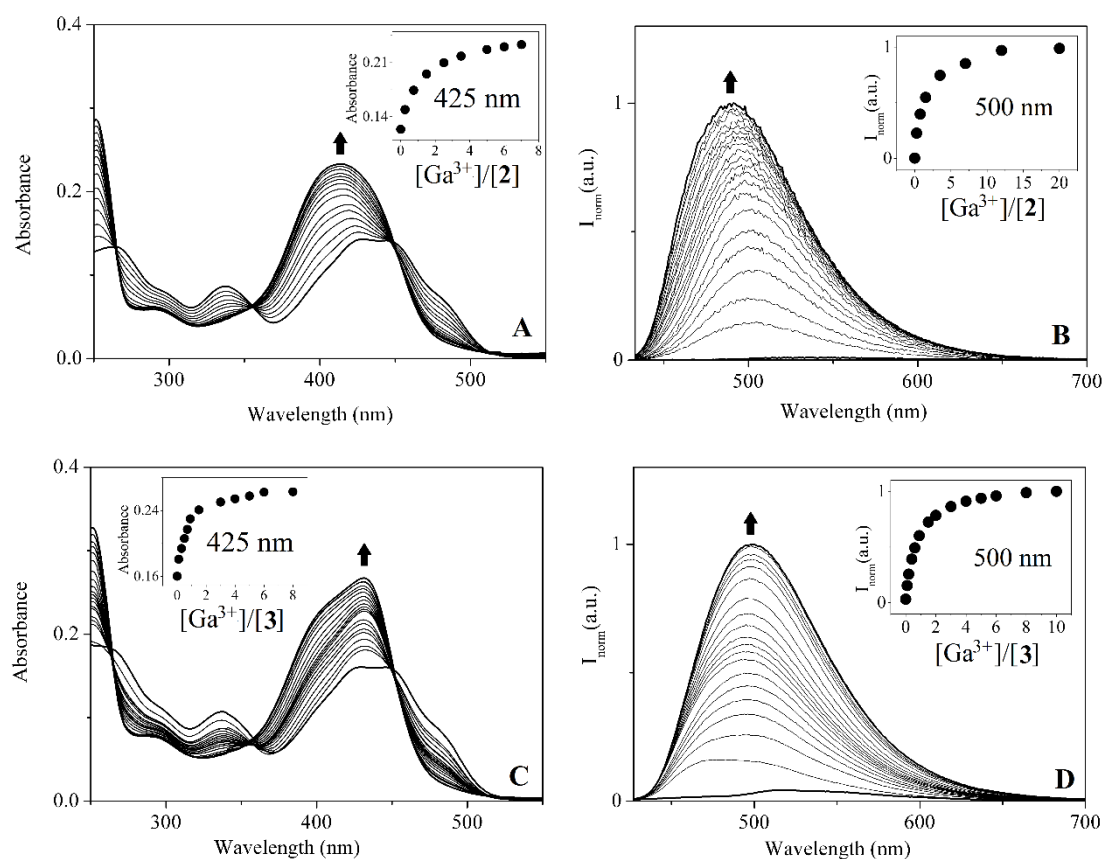

**Figure S10.** Spectrophotometric titrations of **2** (A) and **3** (C), with increasing amounts of  $\text{Ga}^{3+}$  in acetonitrile solution. Inset: Absorption at 425 nm as a function of  $[\text{Ga}^{3+}]/[\mathbf{2}]$  and  $[\text{Ga}^{3+}]/[\mathbf{3}]$  ( $T = 298 \text{ K}$ ;  $[\mathbf{2}] = [\mathbf{3}] = 1.10^{-5} \text{ M}$ ). Spectrofluorimetric titrations of **2** (B) and **3** (D), with increasing amounts of  $\text{Ga}^{3+}$  in acetonitrile solution. Inset: Emission at 500 nm as a function of  $[\text{Ga}^{3+}]/[\mathbf{2}]$  and  $[\text{Ga}^{3+}]/[\mathbf{3}]$  ( $T = 298 \text{ K}$ ;  $[\mathbf{2}] = [\mathbf{3}] = 1.10^{-5} \text{ M}$ ,  $\lambda_{\text{exc}} = 362 \text{ nm}$ ).

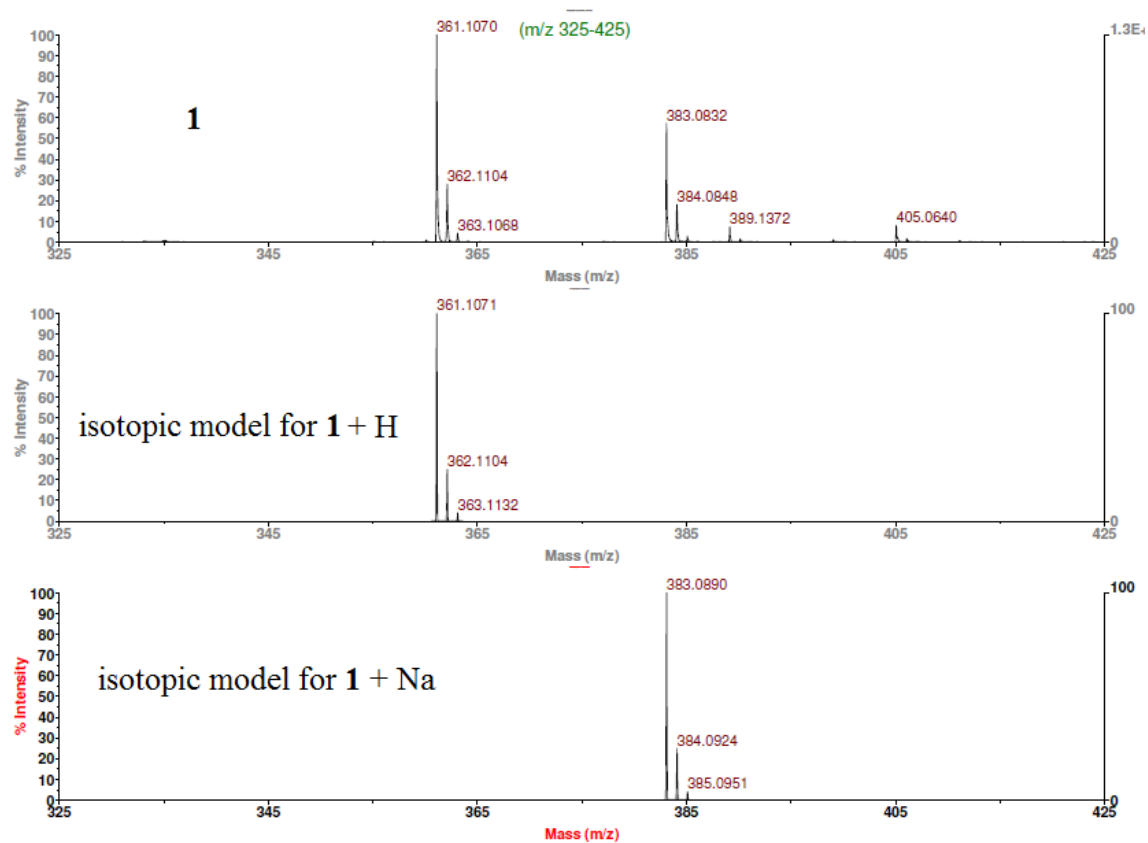

**Figure S11.** MALDI-TOF-MS spectrum of **1**

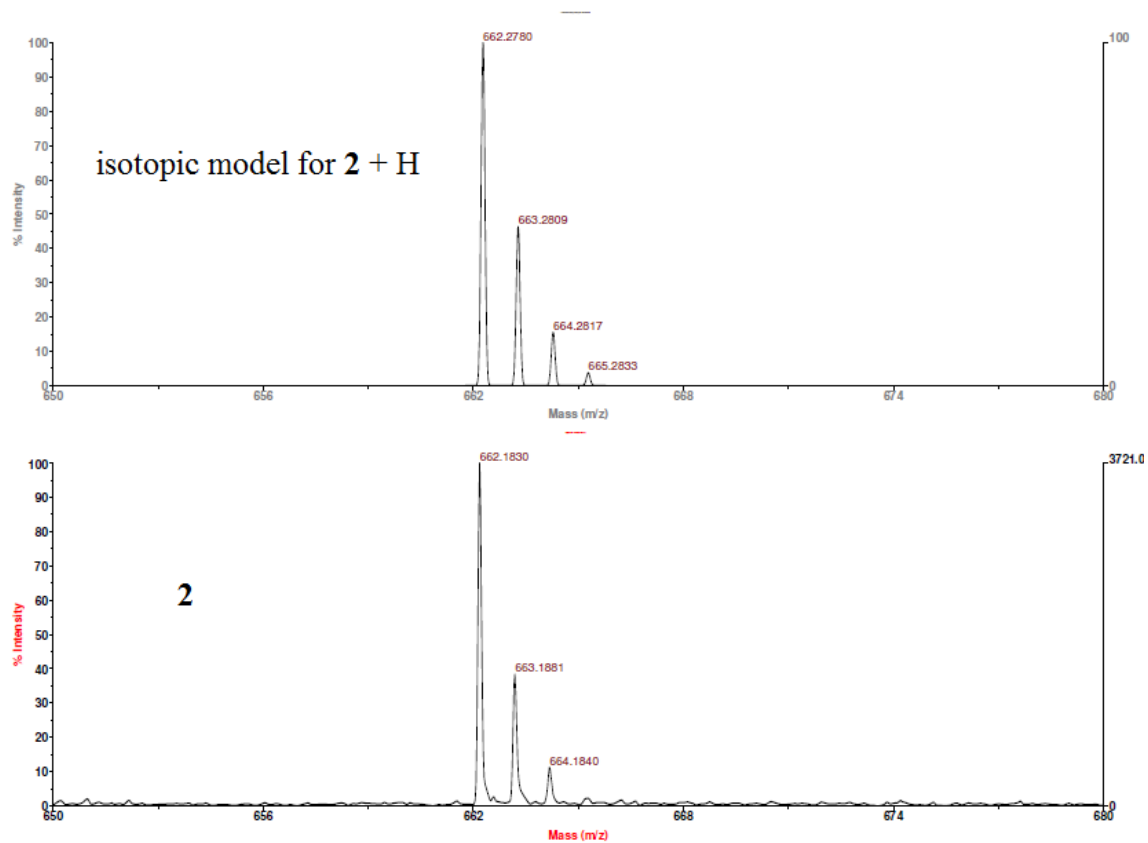

**Figure S12.** MALDI-TOF-MS spectrum of **2**

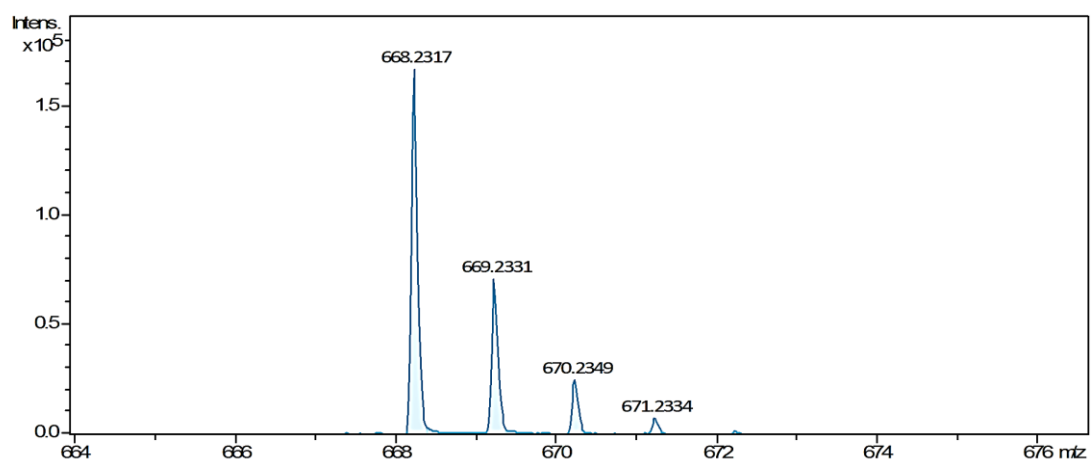

**Figure S13.** HRMS spectrum of **3**

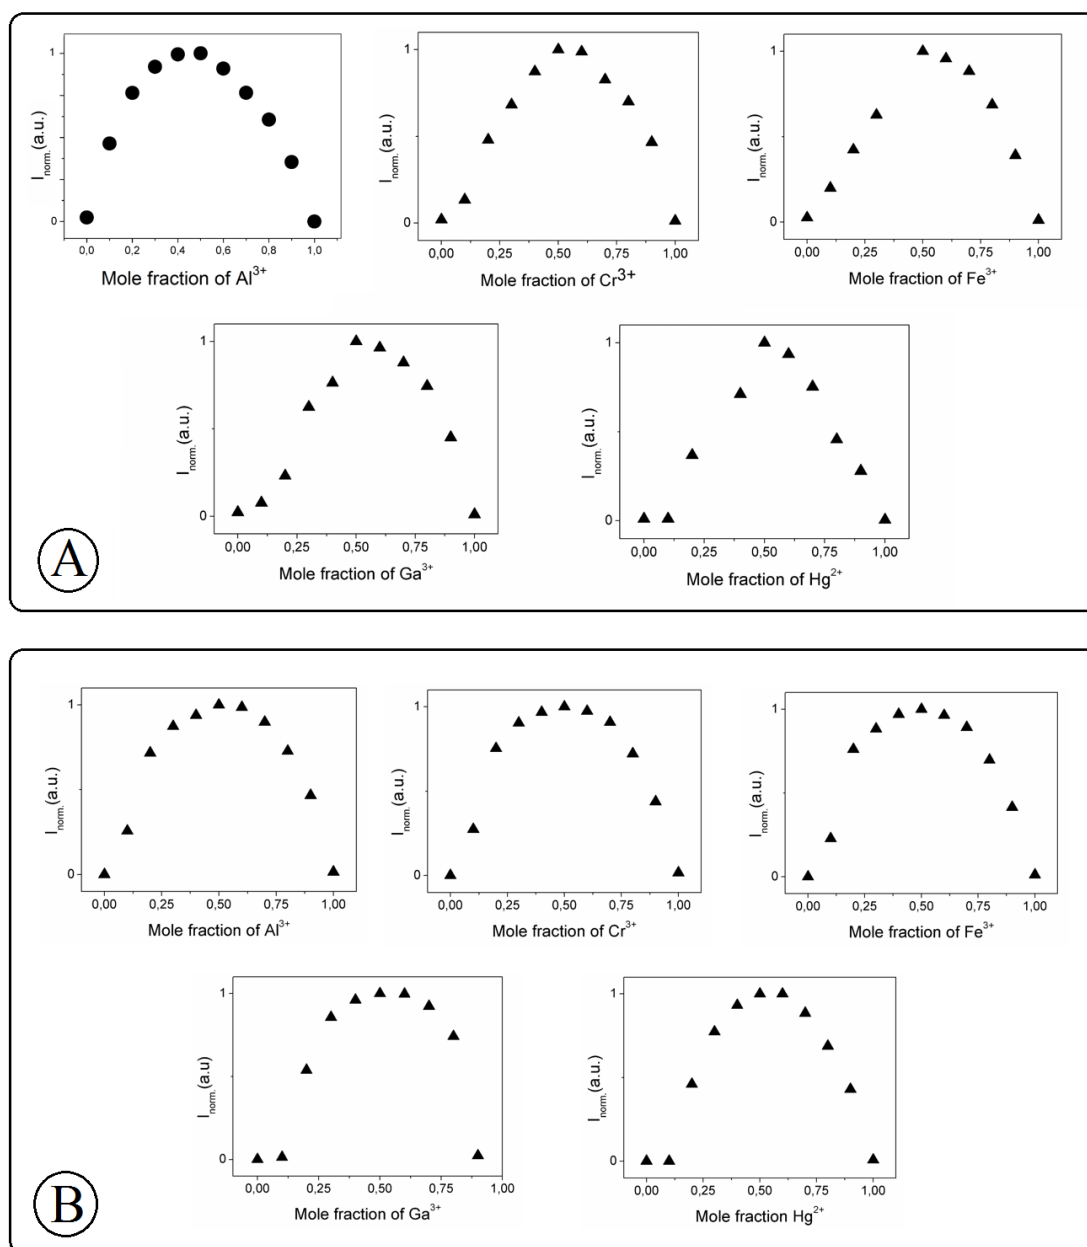

**Figure S14.** Job's plot of **2** and **3** with  $\text{Al}^{3+}$ ,  $\text{Cr}^{3+}$ ,  $\text{Fe}^{3+}$ ,  $\text{Ga}^{3+}$  and  $\text{Hg}^{2+}$ .

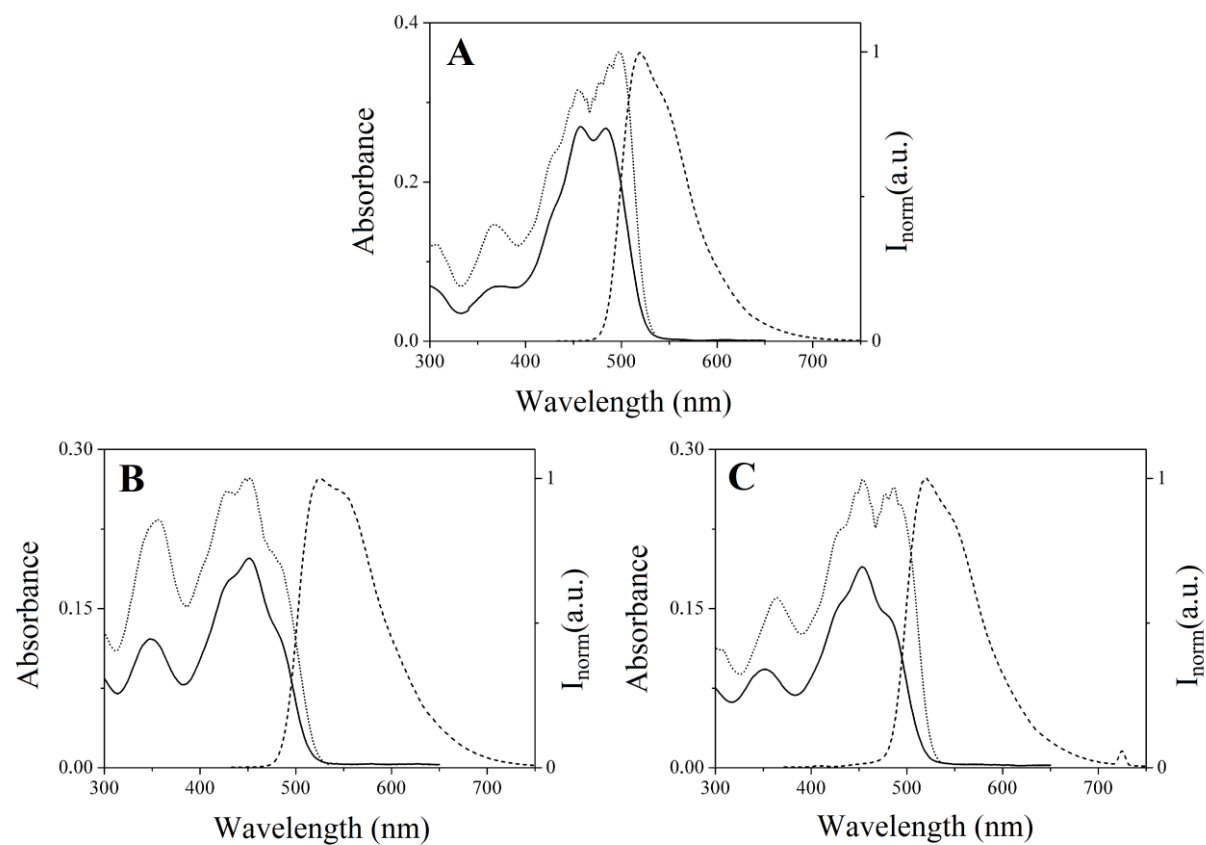

**Figure S15.** Room temperature absorption (full line), normalized emission (dashed line,  $\lambda_{\text{exc}} = 423 \text{ nm}$ ) and excitation spectra (dotted line,  $\lambda_{\text{em}} = 545 \text{ nm}$ ) of compounds **1** (A), **2** (B) and **3** (C) in 1:1 (v/v) acetonitrile/water solutions ( $1.10^{-5}\text{M}$ ).
